# Supplementary material for: When Mast Cells Run Amok: A Comprehensive Review and Case Study on Severe Neonatal Diffuse Cutaneous Mastocytosis
Source: MDPI journal article supplement (doi:10.3390/genes14112021), 2023-10-29
Supplement: s1 [file s1]

| Investment Strategy | Investment Objective | Investment Manager | Investment Period 1 (2010-2011) |  | Investment Period 2 (2012-2013) |  | Investment Period 3 (2014-2015) |  | Investment Period 4 (2016-2017) |  | Investment Period 5 (2018-2019) |  | Investment Period 6 (2020-2021) |  | Investment Period 7 (2022-2023) |  | Investment Period 8 (2024-2025) |  | Investment Period 9 (2026-2027) |  | Investment Period 10 (2028-2029) |  | Investment Period 11 (2030-2031) |  | Investment Period 12 (2032-2033) |  | Investment Period 13 (2034-2035) |  | Investment Period 14 (2036-2037) |  | Investment Period 15 (2038-2039) |  | Investment Period 16 (2040-2041) |  | Investment Period 17 (2042-2043) |  | Investment Period 18 (2044-2045) |  | Investment Period 19 (2046-2047) |  | Investment Period 20 (2048-2049) |  | Investment Period 21 (2050-2051) |  | Investment Period 22 (2052-2053) |  | Investment Period 23 (2054-2055) |  | Investment Period 24 (2056-2057) |  | Investment Period 25 (2058-2059) |  | Investment Period 26 (2060-2061) |  | Investment Period 27 (2062-2063) |  | Investment Period 28 (2064-2065) |  | Investment Period 29 (2066-2067) |  | Investment Period 30 (2068-2069) |  | Investment Period 31 (2070-2071) |  | Investment Period 32 (2072-2073) |  | Investment Period 33 (2074-2075) |  | Investment Period 34 (2076-2077) |  | Investment Period 35 (2078-2079) |  | Investment Period 36 (2080-2081) |  | Investment Period 37 (2082-2083) |  | Investment Period 38 (2084-2085) |  | Investment Period 39 (2086-2087) |  | Investment Period 40 (2088-2089) |  | Investment Period 41 (2090-2091) |  | Investment Period 42 (2092-2093) |  | Investment Period 43 (2094-2095) |  | Investment Period 44 (2096-2097) |  | Investment Period 45 (2098-2099) |  | Investment Period 46 (2100-2101) |  | Investment Period 47 (2102-2103) |  | Investment Period 48 (2104-2105) |  | Investment Period 49 (2106-2107) |  | Investment Period 50 (2108-2109) |  | Investment Period 51 (2110-2111) |  | Investment Period 52 (2112-2113) |  | Investment Period 53 (2114-2115) |  | Investment Period 54 (2116-2117) |  | Investment Period 55 (2118-2119) |  | Investment Period 56 (2120-2121) |  | Investment Period 57 (2122-2123) |  | Investment Period 58 (2124-2125) |  | Investment Period 59 (2126-2127) |  | Investment Period 60 (2128-2129) |  | Investment Period 61 (2130-2131) |  | Investment Period 62 (2132-2133) |  | Investment Period 63 (2134-2135) |  | Investment Period 64 (2136-2137) |  | Investment Period 65 (2138-2139) |  | Investment Period 66 (2140-2141) |  | Investment Period 67 (2142-2143) |  | Investment Period 68 (2144-2145) |  | Investment Period 69 (2146-2147) |  | Investment Period 70 (2148-2149) |  | Investment Period 71 (2150-2151) |  | Investment Period 72 (2152-2153) |  | Investment Period 73 (2154-2155) |  | Investment Period 74 (2156-2157) |  | Investment Period 75 (2158-2159) |  | Investment Period 76 (2160-2161) |  | Investment Period 77 (2162-2163) |  | Investment Period 78 (2164-2165) |  | Investment Period 79 (2166-2167) |  | Investment Period 80 (2168-2169) |  | Investment Period 81 (2170-2171) |  | Investment Period 82 (2172-2173) |  | Investment Period 83 (2174-2175) |  | Investment Period 84 (2176-2177) |  | Investment Period 85 (2178-2179) |  | Investment Period 86 (2180-2181) |  | Investment Period 87 (2182-2183) |  | Investment Period 88 (2184-2185) |  | Investment Period 89 (2186-2187) |  | Investment Period 90 (2188-2189) |  | Investment Period 91 (2190-2191) |  | Investment Period 92 (2192-2193) |  | Investment Period 93 (2194-2195) |  | Investment Period 94 (2196-2197) |  | Investment Period 95 (2198-2199) |  | Investment Period 96 (2200-2201) |  | Investment Period 97 (2202-2203) |  | Investment Period 98 (2204-2205) |  | Investment Period 99 (2206-2207) |  | Investment Period 100 (2208-2209) |  | Investment Period 101 (2210-2211) |  | Investment Period 102 (2212-2213) |  | Investment Period 103 (2214-2215) |  | Investment Period 104 (2216-2217) |  | Investment Period 105 (2218-2219) |  | Investment Period 106 (2220-2221) |  | Investment Period 107 (2222-2223) |  | Investment Period 108 (2224-2225) |  | Investment Period 109 (2226-2227) |  | Investment Period 110 (2228-2229) |  | Investment Period 111 (2230-2231) |  | Investment Period 112 (2232-2233) |  | Investment Period 113 (2234-2235) |  | Investment Period 114 (2236-2237) |  | Investment Period 115 (2238-2239) |  | Investment Period 116 (2240-2241) |  | Investment Period 117 (2242-2243) |  | Investment Period 118 (2244-2245) |  | Investment Period 119 (2246-2247) |  | Investment Period 120 (2248-2249) |  | Investment Period 121 (2250-2251) |  | Investment Period 122 (2252-2253) |  | Investment Period 123 (2254-2255) |  | Investment Period 124 (2256-2257) |  | Investment Period 125 (2258-2259) |  | Investment Period 126 (2260-2261) |  | Investment Period 127 (2262-2263) |  | Investment Period 128 (2264-2265) |  | Investment Period 129 (2266-2267) |  | Investment Period 130 (2268-2269) |  | Investment Period 131 (2270-2271) |  | Investment Period 132 (2272-2273) |  | Investment Period 133 (2274-2275) |  | Investment Period 134 (2276-2277) |  | Investment Period 135 (2278-2279) |  | Investment Period 136 (2280-2281) |  | Investment Period 137 (2282-2283) |  | Investment Period 138 (2284-2285) |  | Investment Period 139 (2286-2287) |  | Investment Period 140 (2288-2289) |  | Investment Period 141 (2290-2291) |  | Investment Period 142 (2292-2293) |  | Investment Period 143 (2294-2295) |  | Investment Period 144 (2296-2297) |  | Investment Period 145 (2298-2299) |  | Investment Period 146 (2300-2301) |  | Investment Period 147 (2302-2303) |  | Investment Period 148 (2304-2305) |  | Investment Period 149 (2306-2307) |  | Investment Period 150 (2308-2309) |  | Investment Period 151 (2310-2311) |  | Investment Period 152 (2312-2313) |  | Investment Period 153 (2314-2315) |  | Investment Period 154 (2316-2317) |  | Investment Period 155 (2318-2319) |  | Investment Period 156 (2320-2321) |  | Investment Period 157 (2322-2323) |  | Investment Period 158 (2324-2325) |  | Investment Period 159 (2326-2327) |  | Investment Period 160 (2328-2329) |  | Investment Period 161 (2330-2331) |  | Investment Period 162 (2332-2333) |  | Investment Period 163 (2334-2335) |  | Investment Period 164 (2336-2337) |  | Investment Period 165 (2338-2339) |  | Investment Period 166 (2340-2341) |  | Investment Period 167 (2342-2343) |  | Investment Period 168 (2344-2345) |  | Investment Period 169 (2346-2347) |  | Investment Period 170 (2348-2349) |  | Investment Period 171 (2350-2351) |  | Investment Period 172 (2352-2353) |  | Investment Period 173 (2354-2355) |  | Investment Period 174 (2356-2357) |  | Investment Period 175 (2358-2359) |  | Investment Period 176 (2360-2361) |  | Investment Period 177 (2362-2363) |  | Investment Period 178 (2364-2365) |  | Investment Period 179 (2366-2367) |  | Investment Period 180 (2368-2369) |  | Investment Period 181 (2370-2371) |  | Investment Period 182 (2372-2373) |  | Investment Period 183 (2374-2375) |  | Investment Period 184 (2376-2377) |  | Investment Period 185 (2378-2379) |  | Investment Period 186 (2380-2381) |  | Investment Period 187 (2382-2383) |  | Investment Period 188 (2384-2385) |  | Investment Period 189 (2386-2387) |  | Investment Period 190 (2388-2389) |  | Investment Period 191 (2390-2391) |  | Investment Period 192 (2392-2393) |  | Investment Period 193 (2394-2395) |  | Investment Period 194 (2396-2397) |  | Investment Period 195 (2398-2399) |  | Investment Period 196 (2400-2401) |  | Investment Period 197 (2402-2403) |  | Investment Period 198 (2404-2405) |  | Investment Period 199 (2406-2407) |  | Investment Period 200 (2408-2409) |  | Investment Period 201 (2410-2411) |  | Investment Period 202 (2412-2413) |  | Investment Period 203 (2414-2415) |  | Investment Period 204 (2416-2417) |  | Investment Period 205 (2418-2419) |  | Investment Period 206 (2420-2421) |  | Investment Period 207 (2422-2423) |  | Investment Period 208 (2424-2425) |  | Investment Period 209 (2426-2427) |  | Investment Period 210 (2428-2429) |  | Investment Period 211 (2430-2431) |  | Investment Period 212 (2432-2433) |  | Investment Period 213 (2434-2435) |  | Investment Period 214 (2436-2437) |  | Investment Period 215 (2438-2439) |  | Investment Period 216 (2440-2441) |  | Investment Period 217 (2442-2443) |  | Investment Period 218 (2444-2445) |  | Investment Period 219 (2446-2447) |  | Investment Period 220 (2448-2449) |  | Investment Period 221 (2450-2451) |  | Investment Period 222 (2452-2453) |  | Investment Period 223 (2454-2455) |  | Investment Period 224 (2456-2457) |  | Investment Period 225 (2458-2459) |  | Investment Period 226 (2460-2461) |  | Investment Period 227 (2462-2463) |  | Investment Period 228 (2464-2465) |  | Investment Period 229 (2466-2467) |  | Investment Period 230 (2468-2469) |  | Investment Period 231 (2470-2471) |  | Investment Period 232 (2472-2473) |  | Investment Period 233 (2474-2475) |  | Investment Period 234 (2476-2477) |  | Investment Period 235 (2478-2479) |  | Investment Period 236 (2480-2481) |  | Investment Period 237 (2482-2483) |  | Investment Period 238 (2484-2485) |  | Investment Period 239 (2486-2487) |  | Investment Period 240 (2488-2489) |  | Investment Period 241 (2490-2491) |  | Investment Period 242 (2492-2493) |  | Investment Period 243 (2494-2495) |  | Investment Period 244 (2496-2497) |  | Investment Period 245 (2498-2499) |  | Investment Period 246 (2500-2501) |  | Investment Period 247 (2502-2503) |  | Investment Period 248 (2504-2505) |  | Investment Period 249 (2506-2507) |  | Investment Period 250 (2508-2509) |  | Investment Period 251 (2510-2511) |  | Investment Period 252 (2512-2513) |  | Investment Period 253 (2514-2515) |  | Investment Period 254 (2516-2517) |  | Investment Period 255 (2518-2519) |  | Investment Period 256 (2520-2521) |  | Investment Period 257 (2522-2523) |  | Investment Period 258 (2524-2525) |  | Investment Period 259 (2526-2527) |  | Investment Period 260 (2528-2529) |  | Investment Period 261 (2530-2531) |  | Investment Period 262 (2532-2533) |  | Investment Period 263 (2534-2535) |  | Investment Period 264 (2536-2537) |  | Investment Period 265 (2538-2539) |  | Investment Period 266 (2540-2541) |  | Investment Period 267 (2542-2543) |  | Investment Period 268 (2544-2545) |  | Investment Period 269 (2546-2547) |  | Investment Period 270 (2548-2549) |  | Investment Period 271 (2550-2551) |  | Investment Period 272 (2552-2553) |  | Investment Period 273 (2554-2555) |  | Investment Period 274 (2556-2557) |  | Investment Period 275 (2558-2559) |  | Investment Period 276 (2560-2561) |  | Investment Period 277 (2562-2563) |  | Investment Period 278 (2564-2565) |  | Investment Period 279 (2566-2567) |  | Investment Period 280 (2568-2569) |  | Investment Period 281 (2570-2571) |  | Investment Period 282 (2572-2573) |  | Investment Period 283 (2574-2575) |  | Investment Period 284 (2576-2577) |  | Investment Period 285 (2578-2579) |  | Investment Period 286 (2580-2581) |  | Investment Period 287 (2582-2583) |  | Investment Period 288 (2584-2585) |  | Investment Period 289 (2586-2587) |  | Investment Period 290 (2588-2589) |  | Investment Period 291 (2590-2591) |  | Investment Period 292 (2592-2593) |  | Investment Period 293 (2594-2595) |  | Investment Period 294 (2596-2597) |  | Investment Period 295 (2598-2599) |  | Investment Period 296 (2600-2601) |  | Investment Period 297 (2602-2603) |  | Investment Period 298 (2604-2605) |  | Investment Period 299 (2606-2607) |  | Investment Period 300 (2608-2609) |  | Investment Period 301 (2610-2611) |  | Investment Period 302 (2612-2613) |  | Investment Period 303 (2614-2615) |  | Investment Period 304 (2616-2617) |  | Investment Period 305 (2618-2619) |  | Investment Period 306 (2620-2621) |  | Investment Period 307 (2622-2623) |  | Investment Period 308 (2624-2625) |  | Investment Period 309 (2626-2627) |  | Investment Period 310 (2628-2629) |  | Investment Period 311 (2630-2631) |  | Investment Period 312 (2632-2633) |  | Investment Period 313 (2634-2635) |  | Investment Period 314 (2636-2637) |  | Investment Period 315 (2638-2639) |  | Investment Period 316 (2640-2641) |  | Investment Period 317 (2642-2643) |  | Investment Period 318 (2644-2645) |  | Investment Period 319 (2646-2647) |  | Investment Period 320 (2648-2649) |  | Investment Period 321 (2650-2651) |  | Investment Period 322 (2652-2653) |  | Investment Period 323 (2654-2655) |  | Investment Period 324 (2656-2657) |  | Investment Period 325 (2658-2659) |  | Investment Period 326 (2660-2661) |  | Investment Period 327 (2662-2663) |  | Investment Period 328 (2664-2665) |  | Investment Period 329 (2666-2667) |  | Investment Period 330 (2668-2669) |  | Investment Period 331 (2670-2671) |  | Investment Period 332 (2672-2673) |  | Investment Period 333 (2674-2675) |  | Investment Period 334 (2676-2677) |  | Investment Period 335 (2678-2679) |  | Investment Period 336 (2680-2681) |  | Investment Period 337 (2682-2683) |  | Investment Period 338 (2684-2685) |  | Investment Period 339 (2686-2687) |  | Investment Period 340 (2688-2689) |  | Investment Period 341 (2690-2691) |  | Investment Period 342 (2692-2693) |  | Investment Period 343 (2694-2695) |  | Investment Period 344 (2696-2697) |  | Investment Period 345 (2698-2699) |  | Investment Period 346 (2700-2701) |  | Investment Period 347 (2702-2703) |  | Investment Period 348 (2704-2705) |  | Investment Period 349 (2706-2707) |  | Investment Period 350 (2708-2709) |  | Investment Period 351 (2710-2711) |  | Investment Period 352 (2712-2713) |  | Investment Period 353 (2714-2715) |  | Investment Period 354 (2716-2717) |  | Investment Period 355 (2718-2719) |  | Investment Period 356 (2720-2721) |  | Investment Period 357 (2722-2723) |  | Investment Period 358 (2724-2725) |  | Investment Period 359 (2726-2727) |  | Investment Period 360 (2728-2729) |  | Investment Period 361 (2730-2731) |  | Investment Period 362 (2732-2733) |  | Investment Period 363 (2734-2735) |  | Investment Period 364 (2736-2737) |  | Investment Period 365 (2738-2739) |  | Investment Period 366 (2740-2741) |  | Investment Period 367 (2742-2743) |  | Investment Period 368 (2744-2745) |  | Investment Period 369 (2746-2747) |  | Investment Period 370 (2748-2749) |  | Investment Period 371 (2750-2751) |  | Investment Period 372 (2752-2753) |  | Investment Period 373 (2754-2755) |  | Investment Period 374 (2756-2757) |  | Investment Period 375 (2758-2759) |  | Investment Period 376 (2760-2761) |  | Investment Period 377 (2762-2763) |  | Investment Period 378 (2764-2765) |  | Investment Period 379 (2766-2767) |  | Investment Period 380 (2768-2769) |  | Investment Period 381 (2770-2771) |  | Investment Period 382 (2772-2773) |  | Investment Period 383 (2774-2775) |  | Investment Period 384 (2776-2777) |  | Investment Period 385 (2778-2779) |  | Investment Period 386 (2780-2781) |  | Investment Period 387 (2782-2783) |  | Investment Period 388 (2784-2785) |  | Investment Period 389 (2786-2787) |  | Investment Period 390 (2788-2789) |  | Investment Period 391 (2790-2791) |  | Investment Period 392 (2792-2793) |  | Investment Period 393 (2794-2795) |  | Investment Period 394 (2796-2797) |  | Investment Period 395 (2798-2799) |  | Investment Period 396 (2800-2801) |  | Investment Period 397 (2802-2803) |  | Investment Period 398 (2804-2805) |  | Investment Period 399 (2806-2807) |  | Investment Period 400 (2808-2809) |  | Investment Period 401 (2810-2811) |  | Investment Period 402 (2812-2813) |  | Investment Period 403 (2814-2815) |  | Investment Period 404 (2816-2817) |  | Investment Period 405 (2818-2819) |  | Investment Period 406 (2820-2821) |  | Investment Period 407 (2822-2823) |  | Investment Period 408 (2824-2825) |  | Investment Period 409 (2826-2827) |  | Investment Period 410 (2828-2829) |  | Investment Period 411 (2830-2831) |  | Investment Period 412 (2832-2833) |  | Investment Period 413 (2834-2835) |  | Investment Period 414 (2836-2837) |  | Investment Period 415 (2838-2839) |  | Investment Period 416 (2840-2841) |  | Investment Period 417 (2842-2843) |  | Investment Period 418 (2844-2845) |  | Investment Period 419 (2846-2847) |  | Investment Period 420 (2848-2849) |  | Investment Period 421 (2850-2851) |  | Investment Period 422 (2852-2853) |  | Investment Period 423 (2854-2855) |  | Investment Period 424 (2856-2857) |  | Investment Period 425 (2858-2859) |  | Investment Period 426 (2860-2861) |  | Investment Period 427 (2862-2863) |  | Investment Period 428 (2864-2865) |  | Investment Period 429 (2866-2867) |  | Investment Period 430 (2868-2869) |  | Investment Period 431 (2870-2871) |  | Investment Period 432 (2872-2873) |  | Investment Period 433 (2874-2875) |  | Investment Period 434 (2876-2877) |  | Investment Period 435 (2878-2879) |  | Investment Period 436 (2880-2881) |  | Investment Period 437 (2882-2883) |  | Investment Period 438 (2884-2885) |  | Investment Period 439 (2886-2887) |  | Investment Period 440 (2888-2889) |  | Investment Period 441 (2890-2891) |  | Investment Period 442 (2892-2893) |  | Investment Period 443 (2894-2895) |  | Investment Period 444 (2896-2897) |  | Investment Period 445 (2898-2899) |  | Investment Period 446 (2900-2901) |  | Investment Period 447 (2902-2903) |  | Investment Period 448 (2904-2905) |  | Investment Period 449 (2906-2907) |  | Investment Period 450 (2908-2909) |  | Investment Period 451 (2910-2911) |  | Investment Period 452 (2912-2913) |  | Investment Period 453 (2914-2915) |  | Investment Period 454 (2916-2917) |  | Investment Period 455 (2918-2919) |  | Investment Period 456 (2920-2921) |  | Investment Period 457 (2922-2923) |  | Investment Period 458 (2924-2925) |  | Investment Period 459 (2926-2927) |  | Investment Period 460 (2928-2929) |  | Investment Period 461 (2930-2931) |  | Investment Period 462 (2932-2933) |  | Investment Period 463 (2934-2935) |  | Investment Period 464 (2936-2937) |  | Investment Period 465 (2938-2939) |  | Investment Period 466 (2940-2941) |  | Investment Period 467 (2942-2943) |  | Investment Period 468 (2944-2945) |  | Investment Period 469 (2946-2947) |  | Investment Period 470 (2948-2949) |  | Investment Period 471 (2950-2951) |  | Investment Period 472 (2952-2953) |  | Investment Period 473 (2954-2955) |  | Investment Period 474 (2956-2957) |  | Investment Period 475 (2958-2959) |  | Investment Period 476 (2960-2961) |  | Investment Period 477 (2962-2963) |  | Investment Period 478 (2964-2965) |  | Investment Period 479 (2966-2967) |  | Investment Period 480 (2968-2969) |  | Investment Period 481 (2970-2971) |  | Investment Period 482 (2972-2973) |  | Investment Period 483 (2974-2975) |  | Investment Period 484 (2976-2977) |  | Investment Period 485 (2978-2979) |  | Investment Period 486 (2980-2981) |  | Investment Period 487 (2982-2983) |  | Investment Period 488 (2984-2985) |  | Investment Period 489 (2986-2987) |  | Investment Period 490 (2988-2989) |  | Investment Period 491 (2990-2991) |  | Investment Period 492 (2992-2993) |  | Investment Period 493 (2994-2995) |  | Investment Period 494 (2996-2997) |  | Investment Period 495 (2998-2999) |  | Investment Period 496 (3000-3001) |  | Investment Period 497 (3002-3003) |  | Investment Period 498 (3004-3005) |  |  |  |
|---------------------|----------------------|--------------------|---------------------------------|--|---------------------------------|--|---------------------------------|--|---------------------------------|--|---------------------------------|--|---------------------------------|--|---------------------------------|--|---------------------------------|--|---------------------------------|--|----------------------------------|--|----------------------------------|--|----------------------------------|--|----------------------------------|--|----------------------------------|--|----------------------------------|--|----------------------------------|--|----------------------------------|--|----------------------------------|--|----------------------------------|--|----------------------------------|--|----------------------------------|--|----------------------------------|--|----------------------------------|--|----------------------------------|--|----------------------------------|--|----------------------------------|--|----------------------------------|--|----------------------------------|--|----------------------------------|--|----------------------------------|--|----------------------------------|--|----------------------------------|--|----------------------------------|--|----------------------------------|--|----------------------------------|--|----------------------------------|--|----------------------------------|--|----------------------------------|--|----------------------------------|--|----------------------------------|--|----------------------------------|--|----------------------------------|--|----------------------------------|--|----------------------------------|--|----------------------------------|--|----------------------------------|--|----------------------------------|--|----------------------------------|--|----------------------------------|--|----------------------------------|--|----------------------------------|--|----------------------------------|--|----------------------------------|--|----------------------------------|--|----------------------------------|--|----------------------------------|--|----------------------------------|--|----------------------------------|--|----------------------------------|--|----------------------------------|--|----------------------------------|--|----------------------------------|--|----------------------------------|--|----------------------------------|--|----------------------------------|--|----------------------------------|--|----------------------------------|--|----------------------------------|--|----------------------------------|--|----------------------------------|--|----------------------------------|--|----------------------------------|--|----------------------------------|--|----------------------------------|--|----------------------------------|--|----------------------------------|--|----------------------------------|--|----------------------------------|--|----------------------------------|--|----------------------------------|--|----------------------------------|--|----------------------------------|--|----------------------------------|--|----------------------------------|--|----------------------------------|--|----------------------------------|--|----------------------------------|--|----------------------------------|--|----------------------------------|--|----------------------------------|--|----------------------------------|--|----------------------------------|--|----------------------------------|--|----------------------------------|--|----------------------------------|--|----------------------------------|--|----------------------------------|--|----------------------------------|--|----------------------------------|--|-----------------------------------|--|-----------------------------------|--|-----------------------------------|--|-----------------------------------|--|-----------------------------------|--|-----------------------------------|--|-----------------------------------|--|-----------------------------------|--|-----------------------------------|--|-----------------------------------|--|-----------------------------------|--|-----------------------------------|--|-----------------------------------|--|-----------------------------------|--|-----------------------------------|--|-----------------------------------|--|-----------------------------------|--|-----------------------------------|--|-----------------------------------|--|-----------------------------------|--|-----------------------------------|--|-----------------------------------|--|-----------------------------------|--|-----------------------------------|--|-----------------------------------|--|-----------------------------------|--|-----------------------------------|--|-----------------------------------|--|-----------------------------------|--|-----------------------------------|--|-----------------------------------|--|-----------------------------------|--|-----------------------------------|--|-----------------------------------|--|-----------------------------------|--|-----------------------------------|--|-----------------------------------|--|-----------------------------------|--|-----------------------------------|--|-----------------------------------|--|-----------------------------------|--|-----------------------------------|--|-----------------------------------|--|-----------------------------------|--|-----------------------------------|--|-----------------------------------|--|-----------------------------------|--|-----------------------------------|--|-----------------------------------|--|-----------------------------------|--|-----------------------------------|--|-----------------------------------|--|-----------------------------------|--|-----------------------------------|--|-----------------------------------|--|-----------------------------------|--|-----------------------------------|--|-----------------------------------|--|-----------------------------------|--|-----------------------------------|--|-----------------------------------|--|-----------------------------------|--|-----------------------------------|--|-----------------------------------|--|-----------------------------------|--|-----------------------------------|--|-----------------------------------|--|-----------------------------------|--|-----------------------------------|--|-----------------------------------|--|-----------------------------------|--|-----------------------------------|--|-----------------------------------|--|-----------------------------------|--|-----------------------------------|--|-----------------------------------|--|-----------------------------------|--|-----------------------------------|--|-----------------------------------|--|-----------------------------------|--|-----------------------------------|--|-----------------------------------|--|-----------------------------------|--|-----------------------------------|--|-----------------------------------|--|-----------------------------------|--|-----------------------------------|--|-----------------------------------|--|-----------------------------------|--|-----------------------------------|--|-----------------------------------|--|-----------------------------------|--|-----------------------------------|--|-----------------------------------|--|-----------------------------------|--|-----------------------------------|--|-----------------------------------|--|-----------------------------------|--|-----------------------------------|--|-----------------------------------|--|-----------------------------------|--|-----------------------------------|--|-----------------------------------|--|-----------------------------------|--|-----------------------------------|--|-----------------------------------|--|-----------------------------------|--|-----------------------------------|--|-----------------------------------|--|-----------------------------------|--|-----------------------------------|--|-----------------------------------|--|-----------------------------------|--|-----------------------------------|--|-----------------------------------|--|-----------------------------------|--|-----------------------------------|--|-----------------------------------|--|-----------------------------------|--|-----------------------------------|--|-----------------------------------|--|-----------------------------------|--|-----------------------------------|--|-----------------------------------|--|-----------------------------------|--|-----------------------------------|--|-----------------------------------|--|-----------------------------------|--|-----------------------------------|--|-----------------------------------|--|-----------------------------------|--|-----------------------------------|--|-----------------------------------|--|-----------------------------------|--|-----------------------------------|--|-----------------------------------|--|-----------------------------------|--|-----------------------------------|--|-----------------------------------|--|-----------------------------------|--|-----------------------------------|--|-----------------------------------|--|-----------------------------------|--|-----------------------------------|--|-----------------------------------|--|-----------------------------------|--|-----------------------------------|--|-----------------------------------|--|-----------------------------------|--|-----------------------------------|--|-----------------------------------|--|-----------------------------------|--|-----------------------------------|--|-----------------------------------|--|-----------------------------------|--|-----------------------------------|--|-----------------------------------|--|-----------------------------------|--|-----------------------------------|--|-----------------------------------|--|-----------------------------------|--|-----------------------------------|--|-----------------------------------|--|-----------------------------------|--|-----------------------------------|--|-----------------------------------|--|-----------------------------------|--|-----------------------------------|--|-----------------------------------|--|-----------------------------------|--|-----------------------------------|--|-----------------------------------|--|-----------------------------------|--|-----------------------------------|--|-----------------------------------|--|-----------------------------------|--|-----------------------------------|--|-----------------------------------|--|-----------------------------------|--|-----------------------------------|--|-----------------------------------|--|-----------------------------------|--|-----------------------------------|--|-----------------------------------|--|-----------------------------------|--|-----------------------------------|--|-----------------------------------|--|-----------------------------------|--|-----------------------------------|--|-----------------------------------|--|-----------------------------------|--|-----------------------------------|--|-----------------------------------|--|-----------------------------------|--|-----------------------------------|--|-----------------------------------|--|-----------------------------------|--|-----------------------------------|--|-----------------------------------|--|-----------------------------------|--|-----------------------------------|--|-----------------------------------|--|-----------------------------------|--|-----------------------------------|--|-----------------------------------|--|-----------------------------------|--|-----------------------------------|--|-----------------------------------|--|-----------------------------------|--|-----------------------------------|--|-----------------------------------|--|-----------------------------------|--|-----------------------------------|--|-----------------------------------|--|-----------------------------------|--|-----------------------------------|--|-----------------------------------|--|-----------------------------------|--|-----------------------------------|--|-----------------------------------|--|-----------------------------------|--|-----------------------------------|--|-----------------------------------|--|-----------------------------------|--|-----------------------------------|--|-----------------------------------|--|-----------------------------------|--|-----------------------------------|--|-----------------------------------|--|-----------------------------------|--|-----------------------------------|--|-----------------------------------|--|-----------------------------------|--|-----------------------------------|--|-----------------------------------|--|-----------------------------------|--|-----------------------------------|--|-----------------------------------|--|-----------------------------------|--|-----------------------------------|--|-----------------------------------|--|-----------------------------------|--|-----------------------------------|--|-----------------------------------|--|-----------------------------------|--|-----------------------------------|--|-----------------------------------|--|-----------------------------------|--|-----------------------------------|--|-----------------------------------|--|-----------------------------------|--|-----------------------------------|--|-----------------------------------|--|-----------------------------------|--|-----------------------------------|--|-----------------------------------|--|-----------------------------------|--|-----------------------------------|--|-----------------------------------|--|-----------------------------------|--|-----------------------------------|--|-----------------------------------|--|-----------------------------------|--|-----------------------------------|--|-----------------------------------|--|-----------------------------------|--|-----------------------------------|--|-----------------------------------|--|-----------------------------------|--|-----------------------------------|--|-----------------------------------|--|-----------------------------------|--|-----------------------------------|--|-----------------------------------|--|-----------------------------------|--|-----------------------------------|--|-----------------------------------|--|-----------------------------------|--|-----------------------------------|--|-----------------------------------|--|-----------------------------------|--|-----------------------------------|--|-----------------------------------|--|-----------------------------------|--|-----------------------------------|--|-----------------------------------|--|-----------------------------------|--|-----------------------------------|--|-----------------------------------|--|-----------------------------------|--|-----------------------------------|--|-----------------------------------|--|-----------------------------------|--|-----------------------------------|--|-----------------------------------|--|-----------------------------------|--|-----------------------------------|--|-----------------------------------|--|-----------------------------------|--|-----------------------------------|--|-----------------------------------|--|-----------------------------------|--|-----------------------------------|--|-----------------------------------|--|-----------------------------------|--|-----------------------------------|--|-----------------------------------|--|-----------------------------------|--|-----------------------------------|--|-----------------------------------|--|-----------------------------------|--|-----------------------------------|--|-----------------------------------|--|-----------------------------------|--|-----------------------------------|--|-----------------------------------|--|-----------------------------------|--|-----------------------------------|--|-----------------------------------|--|-----------------------------------|--|-----------------------------------|--|-----------------------------------|--|-----------------------------------|--|-----------------------------------|--|-----------------------------------|--|-----------------------------------|--|-----------------------------------|--|-----------------------------------|--|-----------------------------------|--|-----------------------------------|--|-----------------------------------|--|-----------------------------------|--|-----------------------------------|--|-----------------------------------|--|-----------------------------------|--|-----------------------------------|--|-----------------------------------|--|-----------------------------------|--|-----------------------------------|--|-----------------------------------|--|-----------------------------------|--|-----------------------------------|--|-----------------------------------|--|-----------------------------------|--|-----------------------------------|--|-----------------------------------|--|-----------------------------------|--|-----------------------------------|--|-----------------------------------|--|-----------------------------------|--|-----------------------------------|--|-----------------------------------|--|-----------------------------------|--|-----------------------------------|--|-----------------------------------|--|-----------------------------------|--|-----------------------------------|--|-----------------------------------|--|-----------------------------------|--|-----------------------------------|--|-----------------------------------|--|-----------------------------------|--|-----------------------------------|--|-----------------------------------|--|-----------------------------------|--|-----------------------------------|--|-----------------------------------|--|-----------------------------------|--|-----------------------------------|--|-----------------------------------|--|-----------------------------------|--|-----------------------------------|--|-----------------------------------|--|-----------------------------------|--|-----------------------------------|--|-----------------------------------|--|-----------------------------------|--|-----------------------------------|--|-----------------------------------|--|-----------------------------------|--|-----------------------------------|--|-----------------------------------|--|-----------------------------------|--|-----------------------------------|--|-----------------------------------|--|-----------------------------------|--|-----------------------------------|--|-----------------------------------|--|-----------------------------------|--|-----------------------------------|--|-----------------------------------|--|-----------------------------------|--|-----------------------------------|--|-----------------------------------|--|-----------------------------------|--|-----------------------------------|--|-----------------------------------|--|-----------------------------------|--|-----------------------------------|--|--|--|
|---------------------|----------------------|--------------------|---------------------------------|--|---------------------------------|--|---------------------------------|--|---------------------------------|--|---------------------------------|--|---------------------------------|--|---------------------------------|--|---------------------------------|--|---------------------------------|--|----------------------------------|--|----------------------------------|--|----------------------------------|--|----------------------------------|--|----------------------------------|--|----------------------------------|--|----------------------------------|--|----------------------------------|--|----------------------------------|--|----------------------------------|--|----------------------------------|--|----------------------------------|--|----------------------------------|--|----------------------------------|--|----------------------------------|--|----------------------------------|--|----------------------------------|--|----------------------------------|--|----------------------------------|--|----------------------------------|--|----------------------------------|--|----------------------------------|--|----------------------------------|--|----------------------------------|--|----------------------------------|--|----------------------------------|--|----------------------------------|--|----------------------------------|--|----------------------------------|--|----------------------------------|--|----------------------------------|--|----------------------------------|--|----------------------------------|--|----------------------------------|--|----------------------------------|--|----------------------------------|--|----------------------------------|--|----------------------------------|--|----------------------------------|--|----------------------------------|--|----------------------------------|--|----------------------------------|--|----------------------------------|--|----------------------------------|--|----------------------------------|--|----------------------------------|--|----------------------------------|--|----------------------------------|--|----------------------------------|--|----------------------------------|--|----------------------------------|--|----------------------------------|--|----------------------------------|--|----------------------------------|--|----------------------------------|--|----------------------------------|--|----------------------------------|--|----------------------------------|--|----------------------------------|--|----------------------------------|--|----------------------------------|--|----------------------------------|--|----------------------------------|--|----------------------------------|--|----------------------------------|--|----------------------------------|--|----------------------------------|--|----------------------------------|--|----------------------------------|--|----------------------------------|--|----------------------------------|--|----------------------------------|--|----------------------------------|--|----------------------------------|--|----------------------------------|--|----------------------------------|--|----------------------------------|--|----------------------------------|--|----------------------------------|--|----------------------------------|--|----------------------------------|--|----------------------------------|--|----------------------------------|--|----------------------------------|--|----------------------------------|--|----------------------------------|--|----------------------------------|--|----------------------------------|--|----------------------------------|--|----------------------------------|--|-----------------------------------|--|-----------------------------------|--|-----------------------------------|--|-----------------------------------|--|-----------------------------------|--|-----------------------------------|--|-----------------------------------|--|-----------------------------------|--|-----------------------------------|--|-----------------------------------|--|-----------------------------------|--|-----------------------------------|--|-----------------------------------|--|-----------------------------------|--|-----------------------------------|--|-----------------------------------|--|-----------------------------------|--|-----------------------------------|--|-----------------------------------|--|-----------------------------------|--|-----------------------------------|--|-----------------------------------|--|-----------------------------------|--|-----------------------------------|--|-----------------------------------|--|-----------------------------------|--|-----------------------------------|--|-----------------------------------|--|-----------------------------------|--|-----------------------------------|--|-----------------------------------|--|-----------------------------------|--|-----------------------------------|--|-----------------------------------|--|-----------------------------------|--|-----------------------------------|--|-----------------------------------|--|-----------------------------------|--|-----------------------------------|--|-----------------------------------|--|-----------------------------------|--|-----------------------------------|--|-----------------------------------|--|-----------------------------------|--|-----------------------------------|--|-----------------------------------|--|-----------------------------------|--|-----------------------------------|--|-----------------------------------|--|-----------------------------------|--|-----------------------------------|--|-----------------------------------|--|-----------------------------------|--|-----------------------------------|--|-----------------------------------|--|-----------------------------------|--|-----------------------------------|--|-----------------------------------|--|-----------------------------------|--|-----------------------------------|--|-----------------------------------|--|-----------------------------------|--|-----------------------------------|--|-----------------------------------|--|-----------------------------------|--|-----------------------------------|--|-----------------------------------|--|-----------------------------------|--|-----------------------------------|--|-----------------------------------|--|-----------------------------------|--|-----------------------------------|--|-----------------------------------|--|-----------------------------------|--|-----------------------------------|--|-----------------------------------|--|-----------------------------------|--|-----------------------------------|--|-----------------------------------|--|-----------------------------------|--|-----------------------------------|--|-----------------------------------|--|-----------------------------------|--|-----------------------------------|--|-----------------------------------|--|-----------------------------------|--|-----------------------------------|--|-----------------------------------|--|-----------------------------------|--|-----------------------------------|--|-----------------------------------|--|-----------------------------------|--|-----------------------------------|--|-----------------------------------|--|-----------------------------------|--|-----------------------------------|--|-----------------------------------|--|-----------------------------------|--|-----------------------------------|--|-----------------------------------|--|-----------------------------------|--|-----------------------------------|--|-----------------------------------|--|-----------------------------------|--|-----------------------------------|--|-----------------------------------|--|-----------------------------------|--|-----------------------------------|--|-----------------------------------|--|-----------------------------------|--|-----------------------------------|--|-----------------------------------|--|-----------------------------------|--|-----------------------------------|--|-----------------------------------|--|-----------------------------------|--|-----------------------------------|--|-----------------------------------|--|-----------------------------------|--|-----------------------------------|--|-----------------------------------|--|-----------------------------------|--|-----------------------------------|--|-----------------------------------|--|-----------------------------------|--|-----------------------------------|--|-----------------------------------|--|-----------------------------------|--|-----------------------------------|--|-----------------------------------|--|-----------------------------------|--|-----------------------------------|--|-----------------------------------|--|-----------------------------------|--|-----------------------------------|--|-----------------------------------|--|-----------------------------------|--|-----------------------------------|--|-----------------------------------|--|-----------------------------------|--|-----------------------------------|--|-----------------------------------|--|-----------------------------------|--|-----------------------------------|--|-----------------------------------|--|-----------------------------------|--|-----------------------------------|--|-----------------------------------|--|-----------------------------------|--|-----------------------------------|--|-----------------------------------|--|-----------------------------------|--|-----------------------------------|--|-----------------------------------|--|-----------------------------------|--|-----------------------------------|--|-----------------------------------|--|-----------------------------------|--|-----------------------------------|--|-----------------------------------|--|-----------------------------------|--|-----------------------------------|--|-----------------------------------|--|-----------------------------------|--|-----------------------------------|--|-----------------------------------|--|-----------------------------------|--|-----------------------------------|--|-----------------------------------|--|-----------------------------------|--|-----------------------------------|--|-----------------------------------|--|-----------------------------------|--|-----------------------------------|--|-----------------------------------|--|-----------------------------------|--|-----------------------------------|--|-----------------------------------|--|-----------------------------------|--|-----------------------------------|--|-----------------------------------|--|-----------------------------------|--|-----------------------------------|--|-----------------------------------|--|-----------------------------------|--|-----------------------------------|--|-----------------------------------|--|-----------------------------------|--|-----------------------------------|--|-----------------------------------|--|-----------------------------------|--|-----------------------------------|--|-----------------------------------|--|-----------------------------------|--|-----------------------------------|--|-----------------------------------|--|-----------------------------------|--|-----------------------------------|--|-----------------------------------|--|-----------------------------------|--|-----------------------------------|--|-----------------------------------|--|-----------------------------------|--|-----------------------------------|--|-----------------------------------|--|-----------------------------------|--|-----------------------------------|--|-----------------------------------|--|-----------------------------------|--|-----------------------------------|--|-----------------------------------|--|-----------------------------------|--|-----------------------------------|--|-----------------------------------|--|-----------------------------------|--|-----------------------------------|--|-----------------------------------|--|-----------------------------------|--|-----------------------------------|--|-----------------------------------|--|-----------------------------------|--|-----------------------------------|--|-----------------------------------|--|-----------------------------------|--|-----------------------------------|--|-----------------------------------|--|-----------------------------------|--|-----------------------------------|--|-----------------------------------|--|-----------------------------------|--|-----------------------------------|--|-----------------------------------|--|-----------------------------------|--|-----------------------------------|--|-----------------------------------|--|-----------------------------------|--|-----------------------------------|--|-----------------------------------|--|-----------------------------------|--|-----------------------------------|--|-----------------------------------|--|-----------------------------------|--|-----------------------------------|--|-----------------------------------|--|-----------------------------------|--|-----------------------------------|--|-----------------------------------|--|-----------------------------------|--|-----------------------------------|--|-----------------------------------|--|-----------------------------------|--|-----------------------------------|--|-----------------------------------|--|-----------------------------------|--|-----------------------------------|--|-----------------------------------|--|-----------------------------------|--|-----------------------------------|--|-----------------------------------|--|-----------------------------------|--|-----------------------------------|--|-----------------------------------|--|-----------------------------------|--|-----------------------------------|--|-----------------------------------|--|-----------------------------------|--|-----------------------------------|--|-----------------------------------|--|-----------------------------------|--|-----------------------------------|--|-----------------------------------|--|-----------------------------------|--|-----------------------------------|--|-----------------------------------|--|-----------------------------------|--|-----------------------------------|--|-----------------------------------|--|-----------------------------------|--|-----------------------------------|--|-----------------------------------|--|-----------------------------------|--|-----------------------------------|--|-----------------------------------|--|-----------------------------------|--|-----------------------------------|--|-----------------------------------|--|-----------------------------------|--|-----------------------------------|--|-----------------------------------|--|-----------------------------------|--|-----------------------------------|--|-----------------------------------|--|-----------------------------------|--|-----------------------------------|--|-----------------------------------|--|-----------------------------------|--|-----------------------------------|--|-----------------------------------|--|-----------------------------------|--|-----------------------------------|--|-----------------------------------|--|-----------------------------------|--|-----------------------------------|--|-----------------------------------|--|-----------------------------------|--|-----------------------------------|--|-----------------------------------|--|-----------------------------------|--|-----------------------------------|--|-----------------------------------|--|-----------------------------------|--|-----------------------------------|--|-----------------------------------|--|-----------------------------------|--|-----------------------------------|--|-----------------------------------|--|-----------------------------------|--|-----------------------------------|--|-----------------------------------|--|-----------------------------------|--|-----------------------------------|--|-----------------------------------|--|-----------------------------------|--|-----------------------------------|--|-----------------------------------|--|-----------------------------------|--|-----------------------------------|--|-----------------------------------|--|-----------------------------------|--|-----------------------------------|--|-----------------------------------|--|-----------------------------------|--|-----------------------------------|--|-----------------------------------|--|-----------------------------------|--|-----------------------------------|--|-----------------------------------|--|-----------------------------------|--|-----------------------------------|--|-----------------------------------|--|-----------------------------------|--|-----------------------------------|--|-----------------------------------|--|-----------------------------------|--|-----------------------------------|--|-----------------------------------|--|-----------------------------------|--|-----------------------------------|--|-----------------------------------|--|-----------------------------------|--|-----------------------------------|--|-----------------------------------|--|-----------------------------------|--|-----------------------------------|--|-----------------------------------|--|-----------------------------------|--|-----------------------------------|--|-----------------------------------|--|-----------------------------------|--|-----------------------------------|--|-----------------------------------|--|-----------------------------------|--|-----------------------------------|--|-----------------------------------|--|-----------------------------------|--|-----------------------------------|--|-----------------------------------|--|-----------------------------------|--|-----------------------------------|--|-----------------------------------|--|-----------------------------------|--|-----------------------------------|--|-----------------------------------|--|-----------------------------------|--|-----------------------------------|--|-----------------------------------|--|-----------------------------------|--|-----------------------------------|--|-----------------------------------|--|-----------------------------------|--|-----------------------------------|--|-----------------------------------|--|-----------------------------------|--|-----------------------------------|--|-----------------------------------|--|-----------------------------------|--|-----------------------------------|--|-----------------------------------|--|-----------------------------------|--|-----------------------------------|--|-----------------------------------|--|-----------------------------------|--|-----------------------------------|--|-----------------------------------|--|-----------------------------------|--|-----------------------------------|--|-----------------------------------|--|-----------------------------------|--|-----------------------------------|--|--|--|
